# Supplementary material
Source: PubMed Central journal article supplement (PMC4023758)
Supplement: AAC.00686-13_zac004142700so1.pdf [file AAC.00686-13_zac004142700so1.pdf]

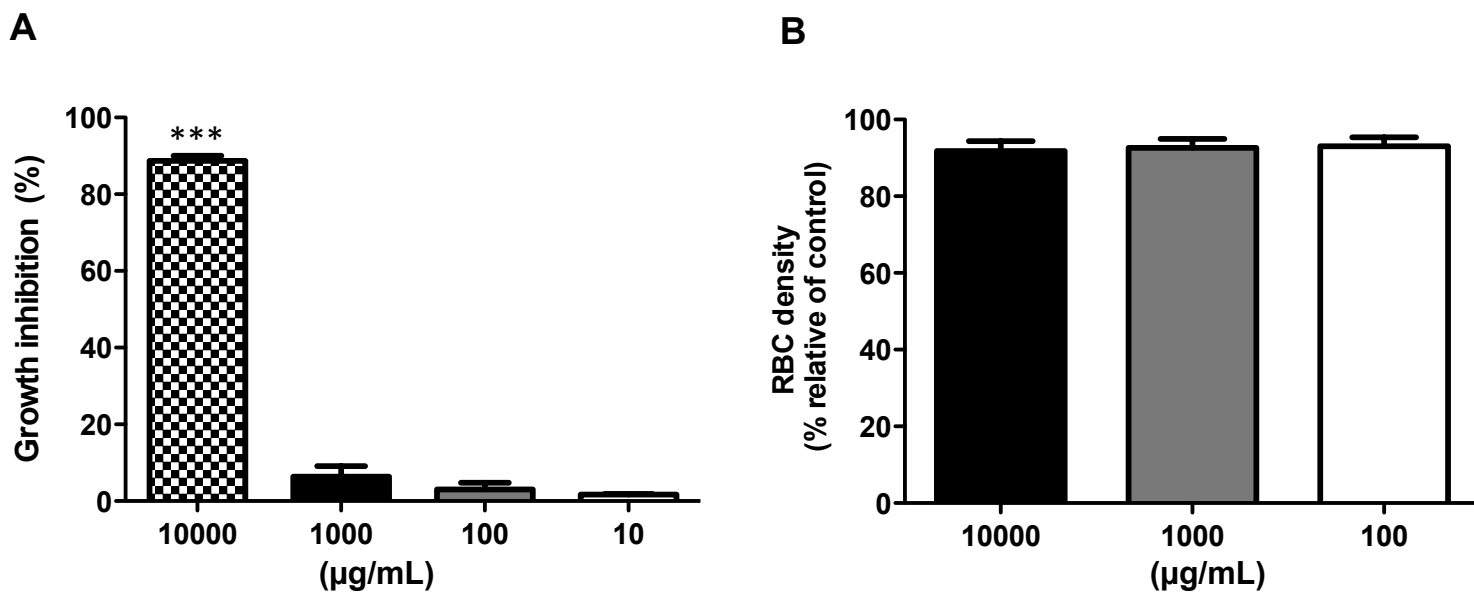

**FIG S1. FucCS cytotoxic effects.** HepG2 cells (A) or non-infected erythrocytes (niEs) (B) were incubated during 48 h at 37°C with increased concentrations of FucCS. As control, cells were incubated in RPMI medium only. Growth inhibition of HepG2 cells was evaluated by means of MTT assay and calculated in relation to control. Red blood cell density (RBCD) was determined as a percentage relative to control. In both cases results are expressed as the mean of triplicates  $\pm$  SD. \*\*\* $P < 0.001$  (t-test).

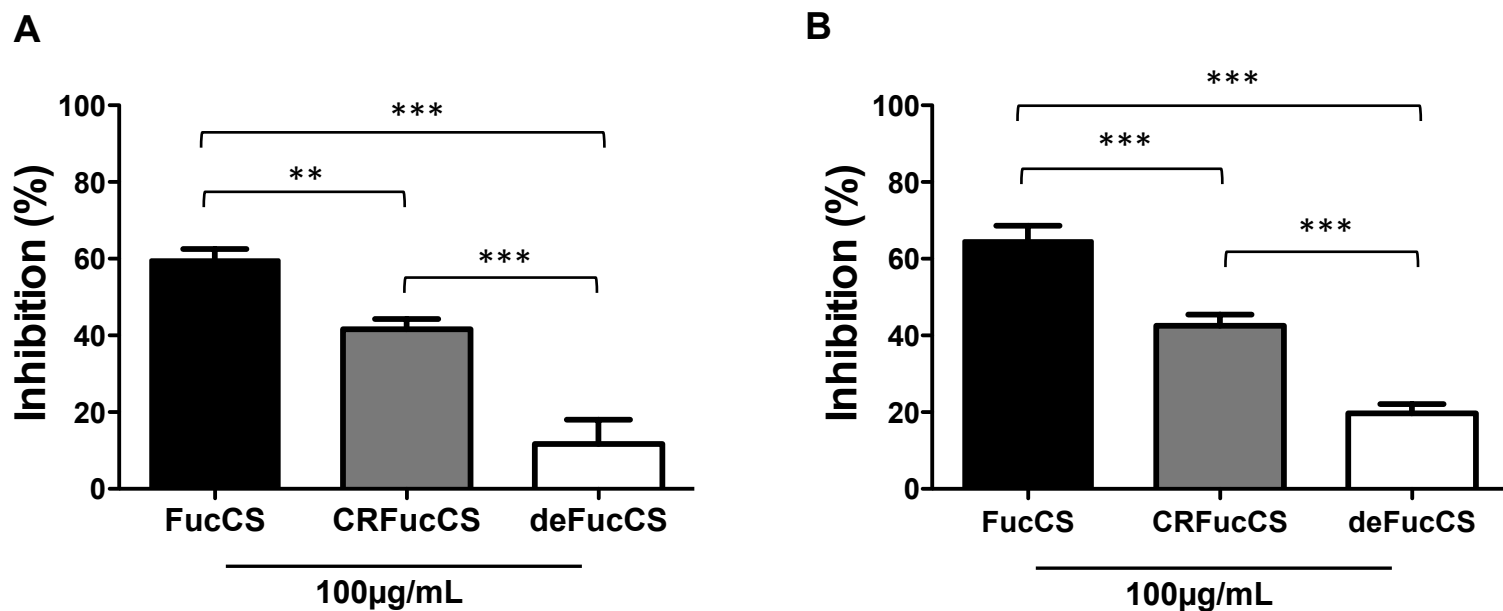

**FIG S2. Effects of native FucCS and its modified forms on monophenotypic parasites.** Pf-iEs<sup>ICAM</sup> (A), Pf-iEs<sup>CD36</sup> (B) were left during 1 h at 37°C on HLECs with 100 μg/mL of native FucCS; defucosylated FucCS (deFucCS); or carboxy-reduced FucCS (CRFucCS) addition or not (control). Inhibition was determined in Giemsa stained slides as a percentage, relative to control, and results are expressed as the mean ± SD of four wells **\*\*P<0.01; \*\*\*P<0.001** (ANOVA test).
